# Supplementary material for: A computational method for the identification of Dengue, Zika and Chikungunya virus species and genotypes
Source: PLoS Negl Trop Dis. 2019 May 8;13(5):e0007231. doi: 10.1371/journal.pntd.0007231 (PMC6527240; doi:10.1371/journal.pntd.0007231)
Supplement: S2 File — A GenBank mining of sequences was performed against envelope genomes of these viruses that had the genotype reported for sensitivity, specificity and accuracy tests of the tool. (XLSX) [file pntd.0007231.s008.xlsx]

## Sheet: DENV-1
AB074760
AB074761
AB178040
AB189120
AB189121
AB195673
AB204803
AB519681
AB608786
AB608787
AB608788
AB608789
AF180817
AF226685
AF226686
AF226687
AF298807
AF311956
AF311957
AF311958
AF350498
AF513110
AF514876
AF514878
AF514883
AF514885
AF514889
AY206457
AY277659
AY277664
AY277665
AY277666
AY708047
AY713473
AY713474
AY713475
AY713476
AY722801
AY722802
AY722803
AY726549
AY726550
AY726551
AY726552
AY726553
AY726554
AY726555
AY732474
AY732475
AY732476
AY732477
AY732478
AY732479
AY732480
AY732481
AY732482
AY732483
AY762084
AY835999
DQ193572
DQ285558
DQ285559
DQ285560
DQ285561
DQ285562
DQ672556
DQ672557
DQ672558
DQ672559
DQ672560
DQ672561
DQ672562
DQ672563
DQ672564
EF025110
EF032590
EF122231
EF122232
EF457905
EU081226
EU081227
EU081228
EU081229
EU081230
EU081231
EU081232
EU081233
EU081234
EU081235
EU081236
EU081237
EU081238
EU081239
EU081240
EU081241
EU081242
EU081243
EU081244
EU081245
EU081246
EU081247
EU081248
EU081249
EU081250
EU081251
EU081252
EU081253
EU081254
EU081255
EU081256
EU081257
EU081258
EU081259
EU081260
EU081261
EU179860
EU179860
EU179861
EU482476
EU482477
EU482478
EU482479
EU482480
EU482481
EU482482
EU482483
EU482484
EU482485
EU482486
EU482487
EU482488
EU482489
EU482490
EU482491
EU482492
EU482493
EU482494
EU482495
EU482496
EU482497
EU482498
EU482499
EU482500
EU482501
EU482502
EU482503
EU482504
EU482505
EU482506
EU482507
EU482508
EU482509
EU482510
EU482511
EU482512
EU482513
EU482514
EU482515
EU482516
EU482517
EU482518
EU482519
EU482567
EU482591
EU482592
EU482609
EU482610
EU482611
EU482615
EU482616
EU482617
EU482618
EU482619
EU482709
EU482710
EU482711
EU482712
EU482713
EU482714
EU482715
EU482716
EU482717
EU482718
EU482789
EU482790
EU482791
EU482792
EU482793
EU482794
EU482795
EU482796
EU482797
EU482798
EU482799
EU482800
EU482801
EU482802
EU482803
EU482804
EU482805
EU482806
EU482807
EU482808
EU482809
EU482810
EU482811
EU482812
EU482813
EU482814
EU482815
EU482816
EU482817
EU482818
EU482819
EU482820
EU482821
EU482822
EU482823
EU482824
EU482825
EU482826
EU482827
EU482828
EU596501
EU596502
EU596503
EU596504
EU660390
EU660391
EU660392
EU660393
EU660394
EU660395
EU660396
EU660397
EU660401
EU660402
EU660403
EU660412
EU660418
EU660419
EU677139
EU677140
EU677150
EU677151
EU677152
EU677153
EU677154
EU677155
EU677156
EU677157
EU677158
EU677159
EU677160
EU677161
EU677162
EU677163
EU677164
EU677165
EU677166
EU677167
EU677168
EU677169
EU677170
EU677171
EU677172
EU677173
EU677174
EU677175
EU677176
EU677177
EU677178
EU687247
EU687251
EU726777
EU726778
EU726779
EU726780
EU726781
EU726782
EU848545
EU863650
FJ024423
FJ024425
FJ024426
FJ024427
FJ024428
FJ024429
FJ024430
FJ024431
FJ024432
FJ024433
FJ024434
FJ024435
FJ024436
FJ024437
FJ024438
FJ024439
FJ024440
FJ024441
FJ024442
FJ024443
FJ024444
FJ024445
FJ024446
FJ024447
FJ024448
FJ024449
FJ024450
FJ024451
FJ024453
FJ024455
FJ024456
FJ024457
FJ024459
FJ024460
FJ024462
FJ024463
FJ024464
FJ024472
FJ024478
FJ024479
FJ024480
FJ024481
FJ024482
FJ024483
FJ024484
FJ024485
FJ176779
FJ176780
FJ182002
FJ182003
FJ182018
FJ182019
FJ182020
FJ182021
FJ182022
FJ182023
FJ182024
FJ182025
FJ182026
FJ182027
FJ182028
FJ182029
FJ182030
FJ182031
FJ182032
FJ182033
FJ182034
FJ182035
FJ182036
FJ196841
FJ196842
FJ196843
FJ196844
FJ196845
FJ196846
FJ196847
FJ196848
FJ205872
FJ205873
FJ205874
FJ205875
FJ205876
FJ205881
FJ205882
FJ205883
FJ205884
FJ373296
FJ373297
FJ373298
FJ373305
FJ384655
FJ390374
FJ390378
FJ390379
FJ390380
FJ390381
FJ390382
FJ390383
FJ390386
FJ390388
FJ410173
FJ410174
FJ410175
FJ410179
FJ410180
FJ410181
FJ410182
FJ410183
FJ410184
FJ410185
FJ410186
FJ410187
FJ410188
FJ410189
FJ410190
FJ410191
FJ410192
FJ410194
FJ410196
FJ410197
FJ410198
FJ410199
FJ410201
FJ410203
FJ410204
FJ410205
FJ410206
FJ410207
FJ410209
FJ410210
FJ410211
FJ410212
FJ410213
FJ410214
FJ410216
FJ410218
FJ410220
FJ410222
FJ410225
FJ410226
FJ410227
FJ410230
FJ410231
FJ410232
FJ410234
FJ410235
FJ410236
FJ410238
FJ410239
FJ410240
FJ410242
FJ410243
FJ410244
FJ410245
FJ410246
FJ410247
FJ410248
FJ410249
FJ410250
FJ410251
FJ410252
FJ410253
FJ410254
FJ410255
FJ410256
FJ410257
FJ410258
FJ410260
FJ410261
FJ410262
FJ410263
FJ410264
FJ410265
FJ410266
FJ410267
FJ410268
FJ410269
FJ410270
FJ410272
FJ410273
FJ410274
FJ410275
FJ410276
FJ410277
FJ410278
FJ410279
FJ410280
FJ410281
FJ410282
FJ410283
FJ410284
FJ410285
FJ410286
FJ410287
FJ410289
FJ410290
FJ432719
FJ432720
FJ432721
FJ432723
FJ432725
FJ432727
FJ432729
FJ432730
FJ432732
FJ432733
FJ432734
FJ432735
FJ432736
FJ432737
FJ432738
FJ432739
FJ432740
FJ432742
FJ432744
FJ432745
FJ432746
FJ432747
FJ432748
FJ432749
FJ461303
FJ461306
FJ461307
FJ461308
FJ461310
FJ461312
FJ461313
FJ461315
FJ461316
FJ461317
FJ461318
FJ461319
FJ461320
FJ461323
FJ461324
FJ461325
FJ461327
FJ461328
FJ461330
FJ461331
FJ461332
FJ461333
FJ461335
FJ461336
FJ461339
FJ461340
FJ461341
FJ469907
FJ469908
FJ469909
FJ478457
FJ478458
FJ547060
FJ547063
FJ547065
FJ547068
FJ547086
FJ547087
FJ547088
FJ547089
FJ562101
FJ562104
FJ562105
FJ562106
FJ639669
FJ639670
FJ639671
FJ639672
FJ639673
FJ639674
FJ639675
FJ639676
FJ639677
FJ639678
FJ639679
FJ639680
FJ639681
FJ639682
FJ639683
FJ639684
FJ639685
FJ639686
FJ639687
FJ639688
FJ639689
FJ639690
FJ639691
FJ639692
FJ639693
FJ639694
FJ639695
FJ639696
FJ639735
FJ639740
FJ639741
FJ639743
FJ639794
FJ639796
FJ639797
FJ639802
FJ639806
FJ639808
FJ639811
FJ639812
FJ639813
FJ639814
FJ639815
FJ639818
FJ639819
FJ639820
FJ639821
FJ639823
FJ639824
FJ687426
FJ687427
FJ687428
FJ687429
FJ687430
FJ687431
FJ687432
FJ687433
FJ744701
FJ744702
FJ810415
FJ810419
FJ850068
FJ850069
FJ850070
FJ850071
FJ850073
FJ850075
FJ850077
FJ850081
FJ850084
FJ850087
FJ850090
FJ850093
FJ850099
FJ850100
FJ850101
FJ850102
FJ850103
FJ850104
FJ850113
FJ850114
FJ859029
FJ873809
FJ873810
FJ873814
FJ882515
FJ882516
FJ882517
FJ882518
FJ882519
FJ882520
FJ882521
FJ882522
FJ882523
FJ882524
FJ882525
FJ882526
FJ882527
FJ882528
FJ882529
FJ882530
FJ882531
FJ882532
FJ882533
FJ882534
FJ882535
FJ882536
FJ882537
FJ882538
FJ882539
FJ882540
FJ882541
FJ882542
FJ882543
FJ882544
FJ882545
FJ882546
FJ882547
FJ882548
FJ882549
FJ882550
FJ882551
FJ882552
FJ882553
FJ882554
FJ882555
FJ882556
FJ882557
FJ882558
FJ882559
FJ882560
FJ882561
FJ882562
FJ882563
FJ882564
FJ882565
FJ882566
FJ882567
FJ882568
FJ882569
FJ882570
FJ882579
FJ898371
FJ898372
FJ898373
FJ898374
FJ898375
FJ898376
FJ898377
FJ898378
FJ898379
FJ898380
FJ898381
FJ898382
FJ898383
FJ898384
FJ898385
FJ898386
FJ898387
FJ898388
FJ898389
FJ898390
FJ898391
FJ898392
FJ898393
FJ898394
FJ898395
FJ898396
FJ898397
FJ898398
FJ898399
FJ898400
FJ898427
FJ898428
FJ898429
FJ898430
FJ898431
FJ898433
FJ898437
FJ898448
FJ906728
FJ906963
FJ906964
FJ906965
GQ199771
GQ199772
GQ199773
GQ199797
GQ199798
GQ199799
GQ199800
GQ199801
GQ199802
GQ199803
GQ199804
GQ199805
GQ199806
GQ199807
GQ199808
GQ199809
GQ199810
GQ199811
GQ199812
GQ199813
GQ199814
GQ199815
GQ199816
GQ199817
GQ199818
GQ199819
GQ199820
GQ199821
GQ199822
GQ199823
GQ199824
GQ199825
GQ199826
GQ199827
GQ199828
GQ199829
GQ199830
GQ199831
GQ199832
GQ199833
GQ199834
GQ199835
GQ199857
GQ199858
GQ199859
GQ199867
GQ199872
GQ199873
GQ199875
GQ199877
GQ868498
GQ868499
GQ868500
GQ868501
GQ868502
GQ868503
GQ868504
GQ868505
GQ868506
GQ868507
GQ868508
GQ868509
GQ868510
GQ868511
GQ868512
GQ868513
GQ868514
GQ868517
GQ868518
GQ868519
GQ868520
GQ868521
GQ868522
GQ868523
GQ868524
GQ868525
GQ868526
GQ868527
GQ868528
GQ868529
GQ868530
GQ868531
GQ868532
GQ868533
GQ868534
GQ868535
GQ868536
GQ868537
GQ868538
GQ868539
GQ868559
GQ868560
GQ868561
GQ868562
GQ868563
GQ868564
GQ868565
GQ868566
GQ868567
GQ868568
GQ868569
GQ868570
GQ868601
GQ868602
GQ868636
GQ868637
GQ868639
GU056029
GU056030
GU056031
GU056032
GU056033
GU131678
GU131679
GU131680
GU131681
GU131682
GU131683
GU131684
GU131685
GU131686
GU131687
GU131688
GU131689
GU131690
GU131691
GU131692
GU131693
GU131694
GU131695
GU131696
GU131697
GU131698
GU131699
GU131700
GU131701
GU131702
GU131703
GU131704
GU131705
GU131706
GU131707
GU131708
GU131709
GU131710
GU131711
GU131712
GU131713
GU131714
GU131715
GU131716
GU131717
GU131718
GU131719
GU131720
GU131721
GU131722
GU131723
GU131724
GU131725
GU131726
GU131727
GU131728
GU131729
GU131730
GU131731
GU131732
GU131733
GU131734
GU131735
GU131736
GU131737
GU131738
GU131739
GU131740
GU131741
GU131742
GU131743
GU131744
GU131745
GU131746
GU131747
GU131748
GU131749
GU131750
GU131751
GU131752
GU131753
GU131754
GU131755
GU131756
GU131757
GU131758
GU131759
GU131760
GU131761
GU131762
GU131763
GU131764
GU131765
GU131766
GU131767
GU131768
GU131769
GU131770
GU131771
GU131772
GU131773
GU131774
GU131775
GU131776
GU131777
GU131778
GU131779
GU131780
GU131781
GU131782
GU131783
GU131784
GU131785
GU131786
GU131787
GU131788
GU131789
GU131790
GU131791
GU131792
GU131793
GU131794
GU131795
GU131796
GU131797
GU131798
GU131799
GU131800
GU131801
GU131802
GU131803
GU131804
GU131805
GU131806
GU131807
GU131808
GU131809
GU131810
GU131811
GU131812
GU131813
GU131814
GU131815
GU131816
GU131817
GU131818
GU131819
GU131820
GU131821
GU131822
GU131823
GU131824
GU131825
GU131826
GU131827
GU131828
GU131829
GU131830
GU131831
GU131832
GU131833
GU131834
GU131835
GU131836
GU131837
GU131838
GU131839
GU131840
GU131841
GU131842
GU131863
GU131887
GU131888
GU131889
GU131890
GU131891
GU131892
GU131893
GU131894
GU131895
GU131919
GU131920
GU131921
GU131922
GU131923
GU131925
GU131926
GU131948
GU131949
GU131956
GU131957
GU131958
GU131960
GU131961
GU131962
GU131963
GU131964
GU131965
GU131966
GU131967
GU131968
GU131969
GU131970
GU131971
GU131972
GU131973
GU131976
GU131977
GU131978
GU131979
GU131980
GU131981
GU131982
GU131983
GU131984
GU370048
GU370049
HE795086
HG316481
HG316482
HM181936
HM181937
HM181938
HM181939
HM181940
HM181941
HM181942
HM181943
HM181944
HM181945
HM181946
HM181947
HM181948
HM181949
HM181950
HM181951
HM181953
HM181954
HM181955
HM181956
HM181957
HM181959
HM181960
HM181961
HM181963
HM181964
HM181965
HM181967
HM181968
HM181969
HM181970
HM469966
HM469967
HM469968
HM488255
HM488256
HM631850
HM631851
HM631852
HM631853
HM631855
HQ166035
HQ166036
HQ166037
HQ332177
HQ332178
HQ332179
HQ332180
HQ332181
HQ332182
HQ332183
HQ624983
HQ624984
HQ891313
HQ891314
HQ891315
HQ891316
JF459993
JF937596
JF937597
JF937598
JF937599
JF937600
JF937602
JF937603
JF937604
JF937605
JF937606
JF937607
JF937608
JF937610
JF937611
JF937612
JF937613
JF937614
JF937615
JF937616
JF937617
JF937618
JF937619
JF937635
JF937644
JF937645
JF937649
JF937650
JF937651
JN000935
JN054255
JN054256
JN093516
JN205310
JN638336
JN638337
JN638338
JN638339
JN638340
JN638341
JN638342
JN638343
JN638344
JN697056
JN697057
JN697058
JN819402
JN819403
JN819405
JN819410
JN819411
JN819412
JN819413
JN819414
JN819415
JN819417
JN819425
JN903578
JN903579
JN903580
JN903581
JQ045646
JQ045647
JQ045648
JQ045649
JQ045650
JQ045651
JQ045652
JQ045653
JQ045654
JQ045655
JQ045656
JQ045657
JQ045658
JQ045659
JQ045660
JQ045661
JQ045662
JQ045663
JQ045664
JQ045665
JQ045666
JQ045667
JQ045668
JQ048541
JQ287660
JQ287661
JQ287662
JQ287663
JQ287666
JQ675358
JQ692085
JQ915071
JQ915072
JQ915073
JQ915074
JQ915075
JQ915076
JQ915077
JQ915079
JQ915080
JQ917404
JQ922544
JQ922545
JQ922546
JQ922547
JQ922548
JX669461
JX669462
JX669463
JX669464
JX669465
JX669466
JX669467
JX669468
JX669469
JX669470
JX669471
JX669472
JX669473
JX669474
JX669475
KC692495
KC692496
KC692497
KC692498
KC692499
KC692500
KC692501
KC692502
KC692503
KC692504
KC692505
KC692506
KC692507
KC692508
KC692509
KC692510
KC692511
KC692512
KC692513
KC692514
KC692515
KC692516
KC692517
KC762620
KC762628
KC762630
KC762632
KC762633
KC762634
KC762635
KC762636
KC762637
KC762638
KC762639
KC762640
KC762641
KC762642
KC762643
KC762644
KC762645
KC762646
KC762647
KC762648
KC762649
KC762650
KC762651
KC762652
KC762653
KC762654
KF184975
KF289072
KF289073
KF864667
KF887994
KF921911
KF921933
KF921934
KF921935
KF921942
KF921949
KF955427
KF955442
KF955443
KF955444
KF955446
KF971869
KF971870
KF971871
KF973453
KF973454
KF973455
KF973456
KF973457
KF973458
KF973459
KF973460
KF973461
KF973462
KF973463
KF973464
KF973465
KF973466
KF973467
KF973468
KF973469
KF973470
KF973471
KF973472
KF973473
KF973474
KF973475
KJ189302
KJ189303
KJ189304
KJ189306
KJ189307
KJ189312
KJ189313
KJ189314
KJ189315
KJ189316
KJ189317
KJ189318
KJ189319
KJ189320
KJ189321
KJ189322
KJ189323
KJ189324
KJ189325
KJ189326
KJ189327
KJ189328
KJ189329
KJ189330
KJ189331
KJ189332
KJ189333
KJ189334
KJ189335
KJ189336
KJ189337
KJ189338
KJ189339
KJ189340
KJ189341
KJ189342
KJ189343
KJ189344
KJ189345
KJ189346
KJ189347
KJ189348
KJ189349
KJ189350
KJ189351
KJ189352
KJ189353
KJ189354
KJ189355
KJ189356
KJ189357
KJ189358
KJ189359
KJ189360
KJ189361
KJ189362
KJ189363
KJ189364
KJ189365
KJ189366
KJ189367
KJ189368
KJ189369
KJ438293
KJ438296
KJ468234
KJ649286
KJ726662
KJ726663
KJ726664
KJ755855
KJ933413
KM204119
KP398852
KP406801
KP406802
KP406803
KP686070
KP723473
KP723476
KR024705
KR024706
KR024707
KT187559
KT187560
KT187561
KT187562
KT187563
KT187564
KT279761
KT827364
KT827365
KT827366
KT827367
KT827368
KT827369
KT827370
KT827371
KT827372
KT827373
KT827374
KT827375
KT827376
KT827377
KT827378
KU509249
KU509250
KU509251
KU509252
KU509253
KU509254
KU509255
KU509256
KU509257
KU509258
KU509259
KU509260
KU509261
KU509262
KU509263
KU509264
KU509265
KU509266
KU666939
KU666940
KU666941
KU666942
KX225483
KX225484
KX225487
KX452050
KX452051
KX452052
KX452053
KX452054
KX452055
KX452056
KX452058
KX459386
KX459387
KX459388
KX459390
KX459391
KX459392
KX620451
KX620452
KX620453
KX621249
KY586306
KY586307
KY586307
KY586308
KY586309
KY586310
KY586311
KY586312
KY586313
KY586314
KY586315
KY586315
KY586316
KY586317
KY586318
KY586319
KY586320
KY586321
KY586322
KY586323
KY586324
KY586325
KY586326
KY586327
KY586327
KY586328
KY586329
KY586330
KY586331
KY586332
KY586333
KY586334
KY586334
KY586335
KY586336
KY586337
KY586347
KY586356
KY586362
KY586363
KY586364
KY586365
KY586366
KY586366
KY586367
KY586368
KY586369
KY586370
KY586371
KY586372
KY586373
KY586374
KY586375
KY586376
KY586377
KY586378
KY586379
KY586379
KY586380
KY586381
KY586382
KY586383
KY586384
KY586385
KY586386
KY586386
KY586387
KY586388
KY586389
KY586390
KY586391
KY586392
KY586393
KY586394
KY586395
KY586396
KY586397
KY586397
KY586398
KY586399
KY586400
KY586401
KY586402
KY586403
KY586404
KY586405
KY586406
KY586406
KY586407
KY586408
KY586409
KY586410
KY586411
KY586412
KY586413
KY586414
KY586415
KY586416
KY586416
KY586417
KY586418
KY586419
KY586420
KY586421
KY586422
KY586423
KY586424
KY586425
KY586426
KY586426
KY586427
KY586428
KY586429
KY586430
KY586431
KY586432
KY586433
KY586434
KY586435
KY586436
KY586437
KY586438
KY586439
KY586440
KY586441
KY586453
KY586458
KY586459
KY586460
KY586461
KY586462
KY586463
KY586464
KY586464
KY586465
KY586466
KY586467
KY586468
KY586469
KY586470
KY586471
KY586472
KY586473
KY586474
KY586475
KY586475
KY586476
KY586477
KY586478
KY586479
KY586480
KY586481
KY586482
KY586483
KY586486
KY586496
KY586500
KY586501
KY586502
KY586503
KY586504
KY586505
KY586505
KY586506
KY586507
KY586508
KY586509
KY586510
KY586511
KY586512
KY586513
KY586514
KY586515
KY586516
KY586516
KY586517
KY586518
KY586519
KY586520
KY586521
KY586522
KY586523
KY586524
KY586525
KY586526
KY586527
KY586527
KY586528
KY586529
KY586530
KY586531
KY586532
KY586533
KY586533
KY586540
KY586541
KY586542
KY586543
KY586544
KY586545
KY586546
KY829115
KY921903
LC011945
LC011946
LC011947
LC011948
LC011949
LC016760
LC128301
M87512
NC_001477
U88535

## Sheet: DENV-2
KF744408
AB122020
AB122021
AB122022
AB189122
AB189123
AB189124
AB479042
AF022434
AF022435
AF022436
AF022437
AF022438
AF100461
AF100462
AF100463
AF100464
AF100465
AF100466
AF100467
AF100468
AF100469
AF119661
AF169678
AF169679
AF169685
AF169688
AF204177
AF204178
AF208496
AF276619
AF359579
AF489932
AJ487271
AJ968413
AY037116
AY702034
AY702035
AY702036
AY702037
AY702038
AY702039
AY702040
AY744147
AY744148
AY744149
AY744150
AY858035
AY858036
DQ181797
DQ181798
DQ181799
DQ181800
DQ181801
DQ181802
DQ181803
DQ181804
DQ181805
DQ181806
DQ448231
DQ645540
DQ645541
DQ645544
DQ645545
DQ645546
DQ645547
DQ645548
DQ645550
DQ645551
DQ645553
DQ645554
DQ645556
EF051521
EF105378
EF105379
EF105382
EF105384
EF105385
EF105386
EF105387
EF105388
EF105389
EF105390
EF457904
EU003591
EU056811
EU056812
EU081177
EU081178
EU081180
EU179857
EU179858
EU359009
EU482444
EU482445
EU482446
EU482447
EU482448
EU482449
EU482450
EU482451
EU482463
EU482464
EU482465
EU482466
EU482467
EU482468
EU482469
EU482470
EU482471
EU482472
EU482473
EU482474
EU482475
EU482541
EU482544
EU482545
EU482546
EU482547
EU482548
EU482549
EU482550
EU482551
EU482552
EU482553
EU482554
EU482556
EU482557
EU482560
EU482561
EU482562
EU482565
EU482568
EU482569
EU482570
EU482571
EU482572
EU482573
EU482574
EU482575
EU482576
EU482577
EU482578
EU482579
EU482580
EU482581
EU482582
EU482583
EU482584
EU482585
EU482586
EU482587
EU482588
EU482589
EU482590
EU482593
EU482594
EU482597
EU482598
EU482599
EU482600
EU482601
EU482602
EU482603
EU482604
EU482605
EU482606
EU482607
EU482608
EU482620
EU482621
EU482622
EU482623
EU482624
EU482625
EU482626
EU482627
EU482628
EU482629
EU482630
EU482631
EU482632
EU482633
EU482634
EU482635
EU482636
EU482637
EU482638
EU482639
EU482640
EU482645
EU482648
EU482660
EU482662
EU482664
EU482666
EU482672
EU482673
EU482674
EU482676
EU482677
EU482678
EU482679
EU482680
EU482681
EU482682
EU482683
EU482684
EU482685
EU482686
EU482687
EU482688
EU482689
EU482690
EU482691
EU482692
EU482693
EU482694
EU482695
EU482696
EU482698
EU482699
EU482700
EU482701
EU482702
EU482703
EU482705
EU482719
EU482720
EU482721
EU482722
EU482723
EU482724
EU482725
EU482726
EU482727
EU482728
EU482729
EU482730
EU482731
EU482732
EU482733
EU482734
EU482735
EU482736
EU482737
EU482738
EU482739
EU482740
EU482741
EU482742
EU482743
EU482744
EU482745
EU482746
EU482747
EU482748
EU482749
EU482750
EU482751
EU482752
EU482753
EU482754
EU482755
EU482756
EU482757
EU482758
EU482759
EU482760
EU482761
EU482762
EU482763
EU482766
EU482769
EU482770
EU482771
EU482772
EU482773
EU482774
EU482775
EU482776
EU482777
EU482778
EU482779
EU482780
EU482781
EU482783
EU482784
EU482785
EU482786
EU482787
EU482788
EU529693
EU529694
EU529695
EU529700
EU529701
EU529706
EU569692
EU569693
EU569694
EU569695
EU569696
EU569697
EU569698
EU569699
EU569700
EU569701
EU569702
EU569703
EU569704
EU569705
EU569706
EU569707
EU569708
EU569709
EU569710
EU569711
EU569712
EU569713
EU569714
EU569715
EU569716
EU569717
EU569718
EU569719
EU569720
EU569721
EU596483
EU596484
EU596485
EU596486
EU596487
EU596488
EU596489
EU596490
EU596491
EU596495
EU596496
EU596497
EU596498
EU596499
EU596500
EU621672
EU660398
EU660399
EU660400
EU660404
EU660405
EU660406
EU660413
EU660414
EU660415
EU660416
EU660417
EU677137
EU677138
EU677141
EU677142
EU677143
EU677144
EU677145
EU677146
EU677147
EU677148
EU677149
EU687199
EU687212
EU687213
EU687214
EU687215
EU687216
EU687217
EU687220
EU687222
EU687223
EU687224
EU687225
EU687227
EU687228
EU687229
EU687230
EU687231
EU687232
EU687235
EU687236
EU687237
EU687238
EU687240
EU687241
EU687242
EU687243
EU687244
EU687245
EU687246
EU687248
EU687249
EU687250
EU726770
EU726775
EU781135
EU854293
EU854294
EU920828
EU920829
EU920830
EU920831
EU920832
EU920833
EU920834
EU920835
EU920836
EU920837
EU920838
EU920839
EU920840
EU920841
EU920842
EU920843
EU920844
EU920845
EU920846
EU920847
EU920848
EU920849
EU920850
FJ024458
FJ024473
FJ024474
FJ024475
FJ024477
FJ182012
FJ182014
FJ196852
FJ196853
FJ205885
FJ226066
FJ373300
FJ373301
FJ390389
FJ390390
FJ390391
FJ410193
FJ410195
FJ410200
FJ410202
FJ410208
FJ410215
FJ410217
FJ410219
FJ410221
FJ410223
FJ410228
FJ410233
FJ410237
FJ410241
FJ410259
FJ410288
FJ410291
FJ432724
FJ432726
FJ461309
FJ461311
FJ461314
FJ461321
FJ467493
FJ478455
FJ478459
FJ547064
FJ547067
FJ547090
FJ562098
FJ639697
FJ639698
FJ639699
FJ639700
FJ639701
FJ639702
FJ639703
FJ639704
FJ639705
FJ639707
FJ639708
FJ639709
FJ639710
FJ639711
FJ639717
FJ639718
FJ639732
FJ639733
FJ639734
FJ639783
FJ639788
FJ639809
FJ639822
FJ639829
FJ639830
FJ639831
FJ639832
FJ639833
FJ639834
FJ639835
FJ639836
FJ639837
FJ687434
FJ687435
FJ687436
FJ687437
FJ687439
FJ687440
FJ687441
FJ687442
FJ687443
FJ687444
FJ687445
FJ687446
FJ687447
FJ744703
FJ744704
FJ744705
FJ744706
FJ744707
FJ744708
FJ744709
FJ744710
FJ744711
FJ744712
FJ744713
FJ744714
FJ744715
FJ744716
FJ744717
FJ744718
FJ744719
FJ744720
FJ744721
FJ744722
FJ744723
FJ744724
FJ744725
FJ744741
FJ744742
FJ744743
FJ744744
FJ744745
FJ810409
FJ810410
FJ810411
FJ810412
FJ810418
FJ850050
FJ850051
FJ850053
FJ850054
FJ850060
FJ850061
FJ850062
FJ850063
FJ850064
FJ850065
FJ850066
FJ850067
FJ850072
FJ850074
FJ850076
FJ850078
FJ850082
FJ850085
FJ850088
FJ850091
FJ850105
FJ850106
FJ850107
FJ850108
FJ850112
FJ850115
FJ850116
FJ850117
FJ850118
FJ850119
FJ850120
FJ850121
FJ859028
FJ873808
FJ873811
FJ882593
FJ882594
FJ882602
FJ898432
FJ898434
FJ898435
FJ898436
FJ898438
FJ898439
FJ898449
FJ898450
FJ898451
FJ898452
FJ898453
FJ898454
FJ898460
FJ898461
FJ898465
FJ898466
FJ898467
FJ898477
FJ898478
FJ898479
FJ906956
FJ906957
FJ906958
FJ906959
FJ906960
FJ906961
FJ906962
FJ906966
FJ906967
FJ906968
FJ906969
FM210202
FM210203
FM210204
FM210205
FM210206
FM210207
FM210208
FM210209
FM210210
FM210211
FM210212
FM210213
FM210214
FM210215
FM210216
FM210217
FM210218
FM210219
FM210220
FM210221
FM210222
FM210223
FM210224
FM210225
FM210226
FM210227
FM210228
FM210229
FM210230
FM210231
FM210232
FM210233
FM210234
FM210235
FM210236
FM210237
FM210238
FM210239
FM210240
FM210241
FM210242
FM210243
FM210244
FM210245
FM210246
GQ199866
GQ199868
GQ199869
GQ199874
GQ199890
GQ199892
GQ199893
GQ199894
GQ199895
GQ199896
GQ199897
GQ199898
GQ252676
GQ252677
GQ398257
GQ398258
GQ398259
GQ398260
GQ398261
GQ398262
GQ398263
GQ398265
GQ398266
GQ398267
GQ398268
GQ398269
GQ398270
GQ398271
GQ398272
GQ398273
GQ398274
GQ398275
GQ398276
GQ398277
GQ398278
GQ398279
GQ398280
GQ398281
GQ398282
GQ398283
GQ398284
GQ398285
GQ398286
GQ398287
GQ398288
GQ398289
GQ398290
GQ398291
GQ398292
GQ398293
GQ398294
GQ398295
GQ398296
GQ398297
GQ398298
GQ398299
GQ398300
GQ398301
GQ398302
GQ398303
GQ398304
GQ398305
GQ398306
GQ398307
GQ398308
GQ398309
GQ398310
GQ398311
GQ398312
GQ398313
GQ398314
GQ868497
GQ868515
GQ868516
GQ868540
GQ868541
GQ868542
GQ868543
GQ868544
GQ868545
GQ868549
GQ868550
GQ868551
GQ868552
GQ868553
GQ868554
GQ868555
GQ868556
GQ868557
GQ868558
GQ868588
GQ868589
GQ868590
GQ868591
GQ868592
GQ868595
GQ868596
GQ868597
GQ868598
GQ868599
GQ868600
GQ868603
GQ868604
GQ868620
GQ868621
GQ868622
GQ868623
GQ868624
GQ868625
GQ868631
GQ868638
GQ868640
GQ868641
GQ868646
GU131864
GU131879
GU131880
GU131881
GU131882
GU131883
GU131884
GU131885
GU131886
GU131896
GU131897
GU131898
GU131899
GU131900
GU131901
GU131902
GU131924
GU131927
GU131928
GU131929
GU131930
GU131931
GU131932
GU131947
GU131955
GU131959
GU131974
GU131975
GU289914
GU369819
GU370050
GU370051
HM181971
HM488257
HM582099
HM582100
HM582101
HM582102
HM582103
HM582104
HM582105
HM582106
HM582107
HM582108
HM582109
HM582110
HM582111
HM582112
HM582113
HM582114
HM582115
HM582116
HM582117
HM631865
HM631866
HM631867
HM631868
HQ012533
HQ012534
HQ012535
HQ012536
HQ012537
HQ012538
HQ026763
HQ332184
HQ332185
HQ332186
HQ332187
HQ332188
HQ332189
HQ332190
HQ541786
HQ541787
HQ541788
HQ541792
HQ541793
HQ541794
HQ541798
HQ541801
HQ541805
HQ634199
HQ705624
HQ705625
HQ733861
HQ891023
HQ999999
JF327392
JF357905
JF357906
JF357907
JF730044
JF730045
JF730046
JF730047
JF730048
JF730049
JF730050
JF730051
JF730052
JF730053
JN368476
JN819407
JN819408
JN819416
JN819418
JN819419
JN819420
JN819421
JN819422
JN819424
JN851113
JN851114
JN851116
JN851117
JN851118
JN851120
JN851121
JN851122
JN851124
JN851125
JN851126
JN851127
JN851128
JN851130
JN851131
JQ045669
JQ045670
JQ045671
JQ045672
JQ045673
JQ045674
JQ045675
JQ045676
JQ045677
JQ045678
JQ045679
JQ045680
JQ045681
JQ045682
JQ045683
JQ045684
JQ045685
JQ045686
JQ686088
JQ922549
JQ922550
JQ922551
JQ922552
JQ922553
JQ955623
JQ955624
JX073928
JX079688
JX079691
JX079694
JX286516
JX286517
JX286518
JX286519
JX286520
JX286521
JX286522
JX286523
JX286524
JX286525
JX286526
JX470186
JX475906
JX567950
JX567951
JX649147
JX649148
JX669476
JX669477
JX669478
JX669479
JX669480
JX669481
JX669482
JX669483
JX669484
JX669485
JX669486
JX669487
JX669488
JX966379
JX966380
KC131142
KC294200
KC294201
KC294202
KC294204
KC294205
KC294206
KC294207
KC294208
KC294209
KC294210
KC294211
KC294212
KC294213
KC294214
KC294215
KC294216
KC294217
KC294218
KC294220
KC294221
KC294222
KC294223
KC762655
KC762657
KC762658
KC762660
KC762662
KC762663
KC762664
KC762665
KC762667
KC762669
KC762670
KC762672
KC762674
KC762675
KC762676
KC762677
KC762678
KC762679
KC964093
KC964094
KC964095
KF041232
KF041233
KF041234
KF041235
KF041236
KF041237
KF360005
KF479233
KF704354
KF704355
KF704356
KF704357
KF704358
KF744398
KF744400
KF744401
KF744403
KF744404
KF744405
KF744406
KF744407
KF921930
KF921931
KF955346
KF955359
KF955360
KF955362
KF955363
KF955364
KF955366
KF955369
KF955371
KF955372
KF955373
KF955385
KF955395
KF955399
KF955400
KF955401
KF955402
KJ010185
KJ010186
KJ189305
KJ189308
KJ189310
KJ189311
KJ189370
KJ701507
KJ734727
KJ830750
KJ918750
KM204118
KM217157
KM217158
KM279513
KM279514
KM279516
KM279518
KM279522
KM279523
KM279526
KM279527
KM279528
KM279530
KM279531
KM279532
KM279533
KM279535
KM279536
KM279537
KM279538
KM279540
KM279541
KM279547
KM279549
KM279550
KM279554
KM279556
KM279557
KM279558
KM279559
KM279560
KM279562
KM279563
KM279565
KM279567
KM279568
KM279569
KM279570
KM279571
KM279572
KM279573
KM279574
KM279575
KM279576
KM279577
KM279578
KM279579
KM279580
KM279581
KM279582
KM279583
KM279584
KM279585
KM279587
KM279588
KM279589
KM279591
KM279592
KM279593
KM279595
KM279596
KM279597
KM279600
KM279602
KM279604
KM279605
KM279607
KM279608
KM279609
KM279610
KM587709
KP012546
KP723479
KR779782
KR920365
KT187553
KT187554
KT187555
KT187556
KT187557
KT187558
KU094070
KU509267
KU509268
KU509270
KU509271
KU509272
KU509273
KU509275
KU509276
KU509277
KU517845
KU517846
KU517847
KU666944
KU666945
KU666946
KU666947
KU666948
KU666949
KU725663
KX225485
KX225486
KX274130
KX372564
KX452015
KX452016
KX452017
KX452018
KX452019
KX452020
KX452021
KX452023
KX452024
KX452025
KX452026
KX452028
KX452029
KX452030
KX452031
KX452032
KX452033
KX452034
KX452035
KX452036
KX452038
KX452039
KX452040
KX452041
KX452043
KX452044
KX452045
KX452046
KX452047
KX452049
KX621245
KX621247
KX621248
KX655786
KX655787
KX655788
KX702403
KX702404
KY415992
KY427084
KY427085
KY586547
KY586548
KY586549
KY586550
KY586551
KY586552
KY586553
KY586554
KY586555
KY586556
KY586557
KY586558
KY586559
KY586560
KY586561
KY586562
KY586563
KY586564
KY586565
KY586566
KY586567
KY586568
KY586569
KY586583
KY586584
KY586585
KY586586
KY586587
KY586588
KY586589
KY586590
KY586591
KY586592
KY586593
KY586594
KY586595
KY586596
KY586597
KY586598
KY586599
KY586600
KY586601
KY586614
KY586615
KY586616
KY586617
KY586618
KY586619
KY586620
KY586621
KY586622
KY586623
KY586624
KY586625
KY586626
KY586627
KY586628
KY586629
KY586630
KY586631
KY586632
KY586633
KY586634
KY586635
KY586636
KY586637
KY586638
KY586651
KY586652
KY586653
KY586654
KY586655
KY586656
KY586657
KY586658
KY586659
KY586671
KY586672
KY586673
KY586674
KY586675
KY586676
KY586677
KY586678
KY586679
KY586680
KY586681
KY586682
KY586683
KY586684
KY586685
KY586686
KY586695
KY586696
KY586697
KY586698
KY586699
KY586700
KY627762
KY627763
KY923048
KY937186
KY937187
KY937190
LC111438
LC129169
M20558
M84727
MF459663
NC_001474
U87411

## Sheet: DENV-3
AY496879
AB189125
AB189126
AB189127
AB189128
AB214879
AB214880
AB214881
AB214882
AF317645
AY099336
AY099337
AY496871
AY496873
AY496874
AY496877
AY648961
AY662691
AY676348
AY676349
AY676350
AY676351
AY676352
AY676353
AY679147
AY744677
AY744678
AY744679
AY744680
AY744681
AY744682
AY744683
AY744684
AY744685
AY766104
AY770511
AY776329
AY858037
AY858038
AY858039
AY858040
AY858041
AY858042
AY858043
AY858044
AY858045
AY858046
AY858047
AY858048
AY876494
AY923865
DQ401690
DQ675519
DQ675520
DQ675521
DQ675522
DQ675523
DQ675524
DQ675525
DQ675526
DQ675527
DQ675528
DQ675529
DQ675530
DQ675531
DQ675532
DQ675533
DQ863638
EF629366
EF629367
EF629368
EF629369
EF629370
EF629373
EF643017
EU081181
EU081182
EU081183
EU081184
EU081185
EU081186
EU081187
EU081188
EU081189
EU081190
EU081191
EU081192
EU081193
EU081194
EU081195
EU081196
EU081197
EU081198
EU081199
EU081200
EU081201
EU081202
EU081203
EU081204
EU081205
EU081206
EU081207
EU081208
EU081209
EU081210
EU081211
EU081212
EU081213
EU081214
EU081215
EU081216
EU081217
EU081218
EU081219
EU081220
EU081221
EU081222
EU081223
EU081224
EU081225
EU367962
EU482452
EU482453
EU482454
EU482455
EU482456
EU482457
EU482461
EU482462
EU482555
EU482558
EU482559
EU482563
EU482564
EU482566
EU482595
EU482596
EU482612
EU482613
EU482614
EU529683
EU529684
EU529685
EU529686
EU529687
EU529688
EU529689
EU529690
EU529691
EU529692
EU529696
EU529697
EU529698
EU529699
EU529702
EU529703
EU529704
EU529705
EU569688
EU569689
EU569690
EU569691
EU596492
EU596493
EU596494
EU660407
EU660408
EU660409
EU660410
EU660411
EU660420
EU687196
EU687197
EU687198
EU687218
EU687219
EU687221
EU687226
EU687233
EU687234
EU687239
EU726768
EU726769
EU726771
EU726772
EU726773
EU726774
EU781136
EU781137
EU854291
EU854292
EU854298
EU932687
EU932688
FJ024465
FJ024466
FJ024467
FJ024468
FJ024469
FJ024470
FJ024471
FJ177308
FJ182004
FJ182005
FJ182006
FJ182007
FJ182008
FJ182009
FJ182010
FJ182011
FJ182013
FJ182015
FJ182037
FJ182038
FJ182039
FJ182040
FJ182041
FJ205870
FJ205871
FJ373302
FJ373303
FJ373304
FJ373306
FJ390371
FJ390372
FJ390373
FJ390375
FJ390376
FJ390377
FJ410176
FJ410177
FJ410178
FJ410229
FJ432722
FJ432728
FJ432731
FJ432741
FJ432743
FJ461322
FJ461326
FJ461329
FJ461334
FJ461337
FJ461338
FJ478456
FJ547061
FJ547069
FJ547070
FJ547071
FJ547072
FJ547073
FJ547074
FJ547075
FJ547076
FJ547077
FJ547078
FJ547079
FJ547080
FJ547081
FJ547082
FJ547083
FJ547084
FJ547085
FJ562100
FJ562102
FJ562107
FJ639712
FJ639713
FJ639714
FJ639715
FJ639716
FJ639719
FJ639720
FJ639721
FJ639722
FJ639723
FJ639724
FJ639725
FJ639726
FJ639727
FJ639728
FJ639746
FJ639747
FJ639749
FJ639750
FJ639751
FJ639752
FJ639753
FJ639754
FJ639755
FJ639756
FJ639757
FJ639758
FJ639759
FJ639760
FJ639761
FJ639762
FJ639763
FJ639765
FJ639766
FJ639767
FJ639768
FJ639769
FJ639770
FJ639771
FJ639772
FJ639774
FJ639775
FJ639776
FJ639777
FJ639778
FJ639779
FJ639780
FJ639781
FJ639782
FJ639784
FJ639785
FJ639786
FJ639787
FJ639789
FJ639790
FJ639791
FJ639792
FJ639793
FJ639795
FJ639798
FJ639799
FJ639800
FJ639801
FJ639803
FJ639804
FJ639805
FJ639807
FJ639810
FJ639816
FJ639817
FJ639825
FJ639826
FJ639827
FJ644564
FJ744700
FJ810416
FJ850048
FJ850049
FJ850052
FJ850055
FJ850056
FJ850079
FJ850080
FJ850083
FJ850086
FJ850089
FJ850092
FJ850094
FJ850096
FJ850097
FJ850098
FJ850109
FJ850110
FJ850111
FJ873812
FJ873813
FJ882571
FJ882572
FJ882573
FJ882574
FJ882575
FJ882576
FJ882577
FJ882578
FJ898440
FJ898441
FJ898442
FJ898443
FJ898444
FJ898445
FJ898446
FJ898447
FJ898455
FJ898456
FJ898457
FJ898458
FJ898459
FJ898462
FJ898463
FJ898464
FJ898468
FJ898469
FJ898470
FJ898471
FJ898472
FJ898473
FJ898474
FJ898475
FJ898476
FJ913015
GQ199860
GQ199861
GQ199862
GQ199863
GQ199864
GQ199865
GQ199870
GQ199871
GQ199886
GQ199887
GQ199888
GQ199889
GQ199891
GQ252674
GQ252678
GQ466079
GQ868546
GQ868547
GQ868548
GQ868571
GQ868572
GQ868573
GQ868574
GQ868575
GQ868576
GQ868577
GQ868578
GQ868586
GQ868587
GQ868616
GQ868617
GQ868626
GQ868627
GQ868628
GQ868629
GQ868634
GU131844
GU131845
GU131846
GU131847
GU131848
GU131849
GU131850
GU131851
GU131852
GU131853
GU131854
GU131855
GU131856
GU131857
GU131858
GU131859
GU131860
GU131861
GU131862
GU131865
GU131866
GU131867
GU131868
GU131869
GU131870
GU131871
GU131872
GU131873
GU131874
GU131875
GU131876
GU131877
GU131878
GU131903
GU131904
GU131905
GU131913
GU131943
GU131944
GU131945
GU131946
GU131950
GU131951
GU131952
GU131953
GU131954
GU189648
GU363549
GU370052
GU370053
HG316483
HG316484
HM181933
HM181934
HM181935
HM181972
HM181973
HM181974
HM181975
HM181976
HM181977
HM181978
HM631854
HM631856
HM631857
HM631858
HM631859
HM631860
HM631861
HM631862
HM631863
HM631864
HM631869
HM756274
HM756275
HM756276
HM756277
HM756278
HM756279
HM756280
HM756281
HM756282
HQ166030
HQ166031
HQ166032
HQ166033
HQ166034
HQ235027
HQ332170
HQ332171
HQ541785
HQ541789
HQ541790
HQ541791
HQ541795
HQ541796
HQ541797
HQ541802
HQ541804
HQ541806
HQ671176
HQ671177
HQ671178
HQ705609
HQ705610
HQ705611
HQ705612
HQ705613
HQ705614
HQ705615
HQ705616
HQ705617
HQ705618
HQ705619
HQ705620
HQ705621
HQ705622
HQ705623
HQ891025
JF295012
JF504679
JF808118
JF808119
JF808120
JF808121
JF808122
JF808123
JF808124
JF808125
JF808126
JF808127
JF808128
JF808129
JF920393
JF920394
JF920395
JF920396
JF920397
JF920398
JF920399
JF920400
JF920401
JF920407
JF920408
JF920409
JF937620
JF937621
JF937622
JF937623
JF937624
JF937625
JF937626
JF937627
JF937628
JF937629
JF937630
JF937631
JF937632
JF937633
JF937634
JF937636
JF937637
JF937638
JF937639
JF937640
JF937641
JF937642
JF937643
JF937646
JF937647
JF937648
JF937652
JN000936
JN000937
JN000938
JN093513
JN093514
JN093515
JN093517
JN183884
JN368477
JN406514
JN406515
JN662391
JN697379
JQ045687
JQ045688
JQ045689
JQ045690
JQ045691
JQ045692
JQ045693
JQ045694
JQ045695
JQ411814
JQ920476
JQ920477
JQ920478
JQ920479
JQ920480
JQ920481
JQ920482
JQ920483
JQ920484
JQ920485
JQ920486
JQ920487
JQ920488
JQ920489
JQ922554
JQ922555
JQ922556
JQ922557
JX669489
JX669490
JX669491
JX669492
JX669493
JX669494
JX669495
JX669496
JX669497
JX669498
JX669499
JX669500
JX669501
JX669502
JX669503
JX669504
JX669505
JX669506
JX669507
JX669508
KC261634
KC425219
KC762681
KC762682
KC762683
KC762684
KC762685
KC762686
KC762688
KC762689
KC762690
KC762691
KC762693
KF041254
KF041255
KF041256
KF041257
KF041258
KF041259
KF824902
KF824903
KF921913
KF921914
KF921916
KF921919
KF921920
KF921921
KF921922
KF921923
KF921924
KF921925
KF921926
KF921927
KF921928
KF921929
KF954945
KF954946
KF955332
KF955333
KF955457
KF955458
KF955459
KF955460
KF955461
KF955462
KF955463
KF955464
KF955471
KF955472
KF955473
KF955474
KF955476
KF955477
KF955479
KF955481
KF955486
KF955487
KF955490
KF955505
KF955506
KF955507
KF955508
KF971695
KF971696
KF971699
KF971704
KF971705
KF971709
KF971711
KF973476
KF973477
KF973478
KF973479
KF973480
KF973481
KF973482
KF973483
KF973484
KF973485
KF973486
KJ189262
KJ189263
KJ189264
KJ189265
KJ189266
KJ189267
KJ189268
KJ189269
KJ189270
KJ189271
KJ189272
KJ189273
KJ189274
KJ189275
KJ189276
KJ189277
KJ189278
KJ189279
KJ189280
KJ189281
KJ189282
KJ189283
KJ189284
KJ189285
KJ189286
KJ189287
KJ189288
KJ189289
KJ189290
KJ189291
KJ189292
KJ189293
KJ189294
KJ189295
KJ189296
KJ189297
KJ189298
KJ189299
KJ189300
KJ189301
KJ622191
KJ622192
KJ622193
KJ622194
KJ622195
KJ622196
KJ622197
KJ622198
KJ622199
KJ643590
KJ737429
KJ737430
KJ830751
KM190937
KR296743
KR296744
KT726340
KT726341
KT726342
KT726343
KT726344
KT726345
KT726346
KT726347
KT726348
KT726349
KT726350
KT726351
KT726352
KT726353
KT726354
KU050695
KU509279
KU509280
KU509282
KU509283
KU509285
KU509286
KU725665
KU725666
KY586711
KY586712
KY586713
KY586714
KY586715
KY586716
KY586717
KY586718
KY586719
KY586720
KY586721
KY586722
KY586723
KY586724
KY586725
KY586726
KY586727
KY586728
KY586729
KY586730
KY586731
KY586732
KY586733
KY586760
KY586761
KY586762
KY586763
KY586764
KY586765
KY586766
KY586767
KY586768
KY586769
KY586770
KY586771
KY586772
KY586773
KY586774
KY586775
KY586776
KY586777
KY586778
KY586793
KY586794
KY586795
KY586796
KY586807
KY586808
KY586809
KY586810
KY586811
KY586812
KY586813
KY586814
KY586815
KY586816
KY586817
KY586818
KY586819
KY586820
KY586821
KY586822
KY863456
KY921906
KY921907
LT898451
LT898452
M93130
MF142763
MF370226
MS631899
NC_001475

## Sheet: DENV-4
JF262783
AF289029
AF326573
AY618988
AY618989
AY618990
AY618991
AY618992
AY618993
AY762085
AY776330
AY858049
AY858050
AY947539
EF456756
EF456757
EF456758
EF456759
EF457906
EU854295
EU854296
EU854297
EU854299
EU854300
EU854301
FJ024424
FJ024476
FJ182016
FJ182017
FJ196849
FJ196850
FJ226067
FJ639736
FJ639737
FJ639738
FJ639739
FJ639742
FJ639744
FJ639745
FJ639748
FJ639764
FJ639773
FJ810417
FJ850057
FJ850058
FJ850059
FJ850095
FJ882580
FJ882581
FJ882582
FJ882583
FJ882584
FJ882585
FJ882586
FJ882587
FJ882588
FJ882589
FJ882590
FJ882591
FJ882592
FJ882595
FJ882596
FJ882597
FJ882598
FJ882599
FJ882600
FJ882601
GQ199876
GQ199878
GQ199879
GQ199880
GQ199881
GQ199882
GQ199883
GQ199884
GQ199885
GQ252675
GQ398256
GQ868579
GQ868580
GQ868581
GQ868582
GQ868583
GQ868584
GQ868585
GQ868594
GQ868642
GQ868643
GQ868644
GQ868645
GU289913
GU318306
GU318307
GU318308
GU318309
GU318310
GU318311
GU318312
GU318313
GU318314
GU318315
GU318316
GU318317
GU318318
HQ332172
HQ332173
HQ332174
HQ332175
HQ332176
HQ875339
JF262781
JF262782
JF741967
JN559740
JN559741
JN638570
JN638571
JN638572
JN819406
JN819409
JN983813
JQ513330
JQ513331
JQ513332
JQ513333
JQ513334
JQ513335
JQ513336
JQ513337
JQ513338
JQ513339
JQ513340
JQ513341
JQ513342
JQ513343
JQ513344
JQ513345
JQ822247
JQ915082
JQ915083
JQ915084
JQ915085
JQ915086
JQ915087
JQ915088
JQ915089
JQ915090
JQ922558
JQ922559
JQ922560
JX024757
JX024758
KC333651
KC762694
KC762695
KC762696
KC762697
KC762698
KC762699
KF041260
KF955510
KF955511
KF955516
KF955527
KF955528
KJ160504
KJ579240
KJ579241
KJ579242
KJ579243
KJ579244
KJ579245
KJ579246
KJ579247
KJ579248
KJ596658
KJ596659
KJ596660
KJ596661
KJ596662
KJ596663
KJ596664
KJ596665
KJ596666
KJ596667
KJ596668
KJ596669
KJ596670
KJ596671
KJ596672
KJ596673
KJ596674
KM190936
KP140942
KP723482
KR011349
KR922405
KT276273
KT794007
KU509287
KU509288
KU513441
KU513442
KU523871
KU523872
KX845005
KY451945
KY586823
KY586824
KY586825
KY586826
KY586827
KY921909
KY921910
LC069810
NC_002640

## Sheet: CHIKV
AB455493
AB455494
AB678677
AB678678
AB678679
AB678680
AB678681
AB678682
AB678683
AB678684
AB678685
AB678686
AB678687
AB678688
AB678689
AB678690
AB678691
AB678692
AB678693
AB678694
AB678695
AB857730
AB857731
AB857732
AB857733
AB857734
AB857735
AB857736
AB857737
AB857738
AB857739
AB857740
AB857741
AB857742
AB857743
AB857744
AB857745
AB857746
AB857747
AB857748
AB857749
AB857750
AB857751
AB857752
AB857753
AB857754
AB857755
AB857756
AB857757
AB857758
AB857759
AB857760
AB857761
AB857762
AB857763
AB857764
AB857765
AB857766
AB857767
AB857768
AB857769
AB857770
AB857771
AB857772
AB857773
AB857774
AB857775
AB857776
AB857777
AB857778
AB857779
AB857780
AB857781
AB857782
AB857783
AB857784
AB857785
AB857786
AB857787
AB857788
AB857789
AB857790
AB857791
AB857792
AB857793
AB857794
AB857795
AB857796
AB857797
AB857798
AB857799
AB857800
AB857801
AB857802
AB857803
AB857804
AB857805
AB857806
AB857807
AB857808
AB857809
AB857810
AB857811
AB857812
AB857813
AB857814
AB857815
AB857816
AB857817
AB857818
AB857819
AB857820
AB857821
AB857822
AB857823
AB857824
AB857825
AB857826
AB857827
AB857828
AB857829
AB857830
AB857831
AB857832
AB857833
AB857834
AB857835
AB857836
AB857837
AB857838
AB857839
AB857840
AB857841
AB860301
AF192891
AF192892
AF192893
AF192894
AF192895
AF192896
AF192897
AF192898
AF192899
AF192900
AF192901
AF192902
AF192903
AF192904
AF192905
AF192907
AF192908
AF339485
AF369024
AF394210
AF394211
AF490259
AM258990
AM258991
AM258992
AM258993
AM258994
AM258995
AM397005
AM397006
AM397007
AM397008
AM397009
AY424803
AY549575
AY549576
AY549577
AY549578
AY549579
AY549580
AY549581
AY549582
AY549583
AY549584
AY726732
DQ309336
DQ443544
DQ451149
DQ451150
DQ451151
DQ462746
DQ462747
DQ462748
DQ462749
DQ462750
DQ489787
DQ520734
DQ520735
DQ520736
DQ520737
DQ520738
DQ520739
DQ520740
DQ520741
DQ520742
DQ520743
DQ520744
DQ520745
DQ520746
DQ520747
DQ520748
DQ520749
DQ520750
DQ520751
DQ520752
DQ520753
DQ520754
DQ888620
EF012359
EF027134
EF027135
EF027136
EF027137
EF027138
EF027139
EF027140
EF027141
EF113095
EF113096
EF187882
EF187883
EF187884
EF187885
EF187886
EF187887
EF187888
EF187889
EF187890
EF187891
EF187892
EF187893
EF187894
EF187895
EF187896
EF187897
EF187898
EF187899
EF187900
EF187901
EF187902
EF187903
EF187904
EF187905
EF187906
EF193853
EF193854
EF193855
EF193856
EF193857
EF193858
EF193859
EF210157
EF451142
EF451143
EF451144
EF451145
EF451146
EF451147
EF451148
EF451149
EF452493
EF452494
EF533650
EF539265
EF555196
EF555197
EF555198
EF555199
EF555200
EF559252
EF613342
EF613343
EF613344
EF674326
EF674327
EF674328
EF674329
EF674330
EF674331
EF674332
EU037962
EU119154
EU131893
EU148606
EU148607
EU148608
EU170523
EU170524
EU170525
EU170526
EU170527
EU188924
EU190879
EU190881
EU190884
EU192142
EU192143
EU244646
EU244823
EU272130
EU272132
EU272133
EU287994
EU287995
EU287996
EU287997
EU287998
EU287999
EU288000
EU288001
EU288002
EU288003
EU350532
EU350533
EU350534
EU350535
EU350536
EU372006
EU383028
EU403052
EU404186
EU441882
EU441883
EU564334
EU564335
EU703759
EU703760
EU703761
EU703762
EU727160
EU727161
EU727162
EU727163
EU727245
EU727246
EU727247
EU727248
EU727249
EU856107
EU856108
EU856109
EU856110
EU856111
EU856112
EU886198
FJ000062
FJ000063
FJ000064
FJ000065
FJ000066
FJ000067
FJ000068
FJ000069
FJ002432
FJ002433
FJ002434
FJ002435
FJ002436
FJ002437
FJ002438
FJ002439
FJ002440
FJ002441
FJ002442
FJ002443
FJ002444
FJ002445
FJ002446
FJ002447
FJ002448
FJ002449
FJ002450
FJ002451
FJ002452
FJ002453
FJ002454
FJ002455
FJ002456
FJ002457
FJ002458
FJ002459
FJ002460
FJ002461
FJ002462
FJ002463
FJ002464
FJ002465
FJ002466
FJ002467
FJ002468
FJ002469
FJ002470
FJ002471
FJ002472
FJ002473
FJ002474
FJ002475
FJ002476
FJ002477
FJ002478
FJ002479
FJ002480
FJ002481
FJ002482
FJ002483
FJ002485
FJ002486
FJ002487
FJ002488
FJ002489
FJ002490
FJ002491
FJ002492
FJ002493
FJ002494
FJ002495
FJ002496
FJ002497
FJ002498
FJ002499
FJ002500
FJ002501
FJ002502
FJ002503
FJ002504
FJ002505
FJ002506
FJ002507
FJ002508
FJ002509
FJ002510
FJ002511
FJ002514
FJ002515
FJ002516
FJ002517
FJ002518
FJ002519
FJ002520
FJ002521
FJ002522
FJ002523
FJ002524
FJ002525
FJ002526
FJ002527
FJ002528
FJ002529
FJ225403
FJ432665
FJ445424
FJ445425
FJ445426
FJ445427
FJ445428
FJ445429
FJ445430
FJ445431
FJ445432
FJ445433
FJ445434
FJ445435
FJ445436
FJ445437
FJ445438
FJ445439
FJ445440
FJ445441
FJ445442
FJ445443
FJ445444
FJ445445
FJ445446
FJ445447
FJ445448
FJ445449
FJ445450
FJ445451
FJ445452
FJ445453
FJ445454
FJ445455
FJ445456
FJ445457
FJ445458
FJ445459
FJ445460
FJ445461
FJ445462
FJ445463
FJ445464
FJ445465
FJ445466
FJ445467
FJ445468
FJ445469
FJ445470
FJ445471
FJ445472
FJ445473
FJ445474
FJ445475
FJ445476
FJ445477
FJ445478
FJ445479
FJ445480
FJ445481
FJ445482
FJ445483
FJ445484
FJ445485
FJ445486
FJ445487
FJ445488
FJ445489
FJ445490
FJ445491
FJ445492
FJ445493
FJ445494
FJ445495
FJ445496
FJ445497
FJ445498
FJ445499
FJ445500
FJ445501
FJ445502
FJ445503
FJ445504
FJ445505
FJ445506
FJ445507
FJ445508
FJ445509
FJ445510
FJ445511
FJ457636
FJ457637
FJ457638
FJ457639
FJ457640
FJ513628
FJ513629
FJ513630
FJ513631
FJ513632
FJ513633
FJ513634
FJ513635
FJ513636
FJ513637
FJ513638
FJ513639
FJ513640
FJ513641
FJ513642
FJ513643
FJ513644
FJ513645
FJ513646
FJ513647
FJ513648
FJ513649
FJ513650
FJ513651
FJ513652
FJ513653
FJ513654
FJ513655
FJ513656
FJ513657
FJ513658
FJ513659
FJ513660
FJ513661
FJ513662
FJ513663
FJ513664
FJ513665
FJ513666
FJ513667
FJ513668
FJ513669
FJ513670
FJ513671
FJ513672
FJ513673
FJ513674
FJ513675
FJ513676
FJ513677
FJ513678
FJ513679
FJ617282
FJ617283
FJ617284
FJ617285
FJ617286
FJ617287
FJ617288
FJ617289
FJ617290
FJ705369
FJ705370
FJ705371
FJ807886
FJ807887
FJ807888
FJ807889
FJ807890
FJ807891
FJ807892
FJ807893
FJ807894
FJ807895
FJ807896
FJ807897
FJ807898
FJ807899
FJ882857
FJ882858
FJ882859
FJ882860
FJ882861
FJ882862
FJ882863
FJ882864
FJ882865
FJ882866
FJ882867
FJ882868
FJ882869
FJ882870
FJ882871
FJ882872
FJ882873
FJ882874
FJ882875
FJ882876
FJ882877
FJ882878
FJ882879
FJ882880
FJ882881
FJ882882
FJ882883
FJ882884
FJ882885
FJ882886
FJ882887
FJ882888
FJ882889
FJ882890
FJ882891
FJ882892
FJ882893
FJ882894
FJ882895
FJ882896
FJ882897
FJ882898
FJ882899
FJ882900
FJ882901
FJ882902
FJ882903
FJ882904
FJ882905
FJ882906
FJ882907
FJ882908
FJ882909
FJ882910
FJ882911
FJ882912
FJ882913
FJ882914
FJ882915
FJ882916
FJ882917
FJ882918
FJ882919
FJ882920
FJ882921
FJ882922
FJ959103
FJ998173
FN295483
FN295484
FN295485
FN295486
FN295487
FN295488
FN295489
FN295490
FN295491
FN295492
FN295493
FN295494
FN295495
FR687340
FR687341
FR687342
FR687343
FR687344
FR687345
FR687346
FR687347
FR687348
FR717336
FR717337
FR846304
FR846305
FR846306
FR846307
FU759460
FU759461
FU759462
FU759463
FU759464
GM839372
GM839373
GM839374
GM839375
GM839376
GQ119362
GQ119363
GQ119364
GQ129130
GQ129131
GQ129132
GQ129133
GQ129134
GQ143741
GQ143742
GQ143743
GQ143744
GQ143745
GQ143746
GQ143747
GQ143748
GQ143749
GQ143750
GQ168719
GQ229486
GQ229487
GQ229488
GQ229489
GQ387365
GQ387366
GQ387367
GQ387368
GQ428210
GQ428211
GQ428212
GQ428213
GQ428214
GQ428215
GQ870296
GQ870297
GQ870298
GQ870299
GQ870300
GQ870301
GQ870302
GQ870303
GQ870304
GQ870305
GQ870306
GQ870307
GQ870308
GQ870309
GQ870310
GQ870311
GQ870312
GQ889486
GQ889487
GQ889488
GQ889489
GQ894940
GQ894941
GQ894942
GQ894943
GQ894944
GQ894945
GQ894946
GQ894947
GQ894948
GQ894949
GQ894950
GQ894951
GQ894952
GQ894953
GQ894954
GQ894955
GQ894956
GQ894957
GQ894958
GQ894959
GQ894960
GQ894961
GQ894962
GQ894963
GQ894964
GQ894965
GQ894966
GQ894967
GQ894968
GQ894969
GQ894970
GQ894971
GQ894972
GQ894973
GQ894974
GQ894975
GQ894976
GQ894977
GQ894978
GQ894979
GQ894980
GQ894981
GQ894982
GQ894983
GQ894984
GQ894985
GQ894986
GQ894987
GQ894988
GQ894989
GQ894990
GQ894991
GQ905863
GQ996370
GQ996371
GQ996372
GQ996373
GQ996374
GQ996375
GQ996376
GQ996377
GQ996378
GQ996379
GU013528
GU013529
GU013530
GU189061
GU199350
GU199351
GU199352
GU199353
GU301779
GU301780
GU301781
GU365847
GU365848
GU365849
GU365850
GU365851
GU365852
GU365853
GU365854
GU365855
GU365856
GU365857
GU365858
GU365859
GU365860
GU365861
GU908223
GU969242
HE578162
HE806461
HM038418
HM045784
HM045785
HM045786
HM045787
HM045788
HM045789
HM045790
HM045791
HM045792
HM045793
HM045794
HM045795
HM045796
HM045797
HM045798
HM045799
HM045800
HM045801
HM045802
HM045803
HM045804
HM045805
HM045806
HM045807
HM045808
HM045809
HM045810
HM045811
HM045812
HM045813
HM045814
HM045815
HM045816
HM045817
HM045818
HM045819
HM045820
HM045821
HM045822
HM045823
HM067743
HM067744
HM159384
HM159385
HM159386
HM159387
HM159388
HM159389
HM159390
HM236458
HM236459
HM236460
HM236461
HM236462
HM236463
HM236464
HM236465
HM236466
HM236467
HM236468
HM236469
HM236470
HM236471
HM236472
HM236473
HM236474
HM236475
HM236476
HM236477
HM236478
HM236479
HM236480
HQ148971
HQ148972
HQ148973
HQ148974
HQ148975
HQ148976
HQ148977
HQ148978
HQ148979
HQ148980
HQ148981
HQ148982
HQ148983
HQ148984
HQ148985
HQ148986
HQ148987
HQ148988
HQ148989
HQ148990
HQ148991
HQ148992
HQ148993
HQ148994
HQ148995
HQ148996
HQ148997
HQ148998
HQ148999
HQ149000
HQ149001
HQ149002
HQ149003
HQ149004
HQ149005
HQ149006
HQ149007
HQ149008
HQ149009
HQ149010
HQ149011
HQ149012
HQ149013
HQ149014
HQ149015
HQ149016
HQ149017
HQ149018
HQ149019
HQ287807
HQ287808
HQ380246
HQ380247
HQ380248
HQ380249
HQ380250
HQ380251
HQ380252
HQ380253
HQ380254
HQ380255
HQ380256
HQ380257
HQ380258
HQ380259
HQ392517
HQ392518
HQ392519
HQ392520
HQ456251
HQ456252
HQ456253
HQ456254
HQ456255
HQ529778
HQ599560
HQ650092
HQ650093
HQ650094
HQ650095
HQ650096
HQ650097
HQ650098
HQ650099
HQ650100
HQ650101
HQ650102
HQ650103
HQ659770
HQ659771
HQ659772
HQ659773
HQ659774
HQ659775
HQ702750
HQ846356
HQ846357
HQ846358
HQ846359
HQ848080
HQ848081
HW249775
HW249776
HW249777
HW249778
HW249779
JA879127
JA879128
JA879129
JA879130
JA879131
JB138046
JC739988
JF264890
JF264891
JF264892
JF272480
JF274082
JF297648
JF950613
JF950614
JF950615
JF950616
JF950617
JF950618
JF950619
JF950620
JF950621
JF950622
JF950623
JF950624
JF950625
JF950626
JF950627
JF950628
JF950629
JF950630
JF950631
JF950632
JF950633
JF950634
JF950635
JF950636
JF950637
JF950638
JF950639
JF950640
JF950641
JF950642
JF950643
JF950644
JF950645
JF950646
JF950647
JF950648
JN038571
JN048803
JN048804
JN048805
JN048806
JN048807
JN048808
JN048809
JN048810
JN048811
JN048812
JN048813
JN048814
JN048815
JN048816
JN048817
JN048818
JN048819
JN048820
JN048821
JN048822
JN048823
JN048824
JN048825
JN048826
JN091130
JN091131
JN091132
JN091133
JN091134
JN091135
JN091136
JN091137
JN091138
JN091139
JN091140
JN091141
JN091142
JN091143
JN091144
JN091145
JN091146
JN091147
JN091148
JN091149
JN091150
JN091151
JN091152
JN091153
JN091154
JN091155
JN091156
JN091157
JN091158
JN091159
JN091160
JN091161
JN091162
JN091163
JN091164
JN091165
JN558834
JN558835
JN558836
JN578240
JN578241
JN578242
JN578243
JN578244
JN578245
JN578246
JN578247
JN578248
JN590257
JN590258
JN590259
JN590260
JN590261
JN590262
JN590263
JN590264
JN590265
JN590266
JN590267
JN661148
JN661149
JN661150
JN661151
JN661152
JN661153
JN661154
JN661155
JN661156
JN711127
JN711128
JN711129
JN711130
JN711131
JN711132
JN711133
JN711134
JN711135
JN711136
JN711137
JN711138
JN712436
JN712437
JN786883
JN786884
JN786885
JN786886
JN981129
JN981130
JN981131
JN981132
JN981133
JQ013687
JQ013688
JQ013689
JQ013690
JQ013691
JQ013692
JQ013693
JQ013694
JQ013695
JQ013696
JQ013697
JQ013698
JQ013699
JQ013700
JQ013701
JQ013702
JQ013703
JQ013704
JQ013705
JQ013706
JQ013707
JQ065885
JQ065886
JQ065887
JQ065888
JQ065889
JQ065890
JQ065891
JQ065892
JQ067624
JQ231210
JQ231211
JQ319798
JQ319799
JQ319800
JQ319801
JQ319802
JQ319803
JQ740173
JQ740174
JQ740175
JQ740176
JQ740177
JQ740178
JQ740179
JQ740180
JQ740181
JQ740182
JQ740183
JQ740184
JQ740185
JQ740186
JQ861253
JQ861254
JQ861255
JQ861256
JQ861257
JQ861258
JQ861259
JQ861260
JQ886092
JQ886093
JQ886094
JQ943687
JQ943688
JQ943689
JQ943690
JQ943691
JQ943692
JQ943693
JQ943694
JQ943695
JQ943696
JQ943697
JQ943698
JQ943699
JQ943700
JQ943701
JQ943702
JQ943703
JQ943704
JQ943705
JQ943706
JQ943707
JQ943708
JQ943709
JQ943710
JQ943711
JQ943712
JQ943713
JQ943714
JQ943715
JQ943716
JQ943717
JQ943718
JQ943719
JQ943720
JX026955
JX026956
JX080286
JX080287
JX080288
JX088705
JX265960
JX265961
JX265962
JX276645
JX276646
JX276647
JX276648
JX276649
JX276650
JX442959
JX442960
JX442961
JX442962
JX442963
JX442964
JX442965
JX442966
JX442967
JX442968
JX839766
JX839767
JX839768
JX839769
JX839770
JX839771
JX839772
JX839773
JX839774
JX839775
JX839776
JX839777
JX839778
JX839779
JX839780
JX839781
JX839782
JX839783
JX839784
JX839785
JX839786
JX839787
JX839788
JX839789
JX839790
JX839791
JX839792
JX839793
JX839794
JX839795
JX839796
JX839797
JX839798
JX839799
JX839800
JX839801
JX839802
JX839803
JX839804
JX839805
JX839806
JX839807
JX839808
JX839809
JX839810
JX839811
JX839812
JX839813
JX839814
JX839815
JX839816
JX839817
JX839818
JX839819
JX839820
JX839821
JX839822
JX839823
JX839824
JX839825
JX839826
JX839827
JX839828
JX839829
JX911895
KC352904
KC488650
KC524770
KC524771
KC524772
KC614648
KC731581
KC731582
KC731583
KC731584
KC731585
KC731586
KC810970
KC814929
KC862329
KC879559
KC879560
KC879561
KC879562
KC879563
KC879564
KC879565
KC879566
KC879567
KC879568
KC879569
KC879570
KC879571
KC879572
KC879573
KC879574
KC879575
KC879576
KC879577
KC879578
KC969207
KC969208
KC999036
KF151174
KF151175
KF151176
KF151177
KF151178
KF283986
KF283987
KF305686
KF305687
KF305688
KF305689
KF305690
KF305691
KF305692
KF305693
KF305694
KF305695
KF305696
KF305697
KF305698
KF305699
KF305700
KF305701
KF305702
KF305703
KF305704
KF305705
KF318729
KF425514
KF578457
KF578458
KF578459
KF578460
KF578461
KF578462
KF587904
KF587905
KF590564
KF590565
KF590566
KF590567
KF818472
KF818473
KF818474
KF818475
KF840729
KF872195
KF925286
KF925287
KF925288
KF925289
KF925290
KF925291
KF925292
KF925293
KF925294
KF925295
KF925296
KF925297
KF925298
KF925299
KF925300
KF985235
KJ451622
KJ451623
KJ451624
KJ508819
KJ508820
KJ508821
KJ579184
KJ579185
KJ579186
KJ579187
KJ679577
KJ679578
KJ689452
KJ689453
KJ729829
KJ729830
KJ729831
KJ729832
KJ729833
KJ729834
KJ729835
KJ729836
KJ729838
KJ729839
KJ729840
KJ729841
KJ729842
KJ729843
KJ729845
KJ729846
KJ729847
KJ729848
KJ729849
KJ729850
KJ729851
KJ729852
KJ742803
KJ742804
KJ742805
KJ742806
KJ742807
KJ742808
KJ742809
KJ742810
KJ796844
KJ796845
KJ796846
KJ796847
KJ796848
KJ796849
KJ796850
KJ796851
KJ796852
KJ866155
KJ939333
KJ939354
KJ939355
KJ941050
KM014692
KM014693
KM014694
KM014695
KM014696
KM058063
KM192348
KM258100
KM258101
KM258102
KM258103
KM258104
KM258105
KM258106
KM258107
KM258108
KM258109
KM258110
KM258111
KM258112
KM258113
KM258114
KM258115
KM258116
KM258117
KM258118
KM258119
KM267638
KM503141
KM586248
KM673291
KM923917
KM923918
KM923919
KM923920
KM985619
KM985981
KM985982
KP001167
KP001168
KP003807
KP003808
KP003809
KP003810
KP003811
KP003812
KP003813
KP009589
KP055786
KP164567
KP164568
KP164569
KP164570
KP164571
KP164572
KP164869
KP239982
KP239983
KP239984
KP239985
KP239987
KP252141
KP252142
KP276676
KP276677
KP336549
KP336550
KP336551
KP336552
KP336553
KP336554
KP336555
KP336556
KP685237
KP702204
KP702205
KP702297
KP851709
KP851710
KR002040
KR046227
KR046228
KR046229
KR046230
KR046231
KR046232
KR046233
KR046234
KR264949
KR264950
KR264951
KR559470
KR559471
KR559472
KR559473
KR559474
KR559475
KR559476
KR559477
KR559478
KR559479
KR559480
KR559481
KR559482
KR559483
KR559484
KR559485
KR559486
KR559487
KR559488
KR559489
KR559490
KR559491
KR559492
KR559493
KR559494
KR559495
KR559496
KR559497
KR559498
KR706558
KR706559
KR706560
KR706561
KR818091
KR818092
KR818093
KT192707
KT192708
KT192709
KT192710
KT192711
KT192712
KT192713
KT192714
KT192715
KT192716
KT192717
KT192718
KT192719
KT192720
KT192721
KT192722
KT192723
KT192724
KT192725
KT192726
KT192727
KT192728
KT192729
KT192730
KT192731
KT192732
KT192733
KT192734
KT192735
KT192736
KT192737
KT192738
KT192739
KT192740
KT211023
KT211024
KT211025
KT211026
KT211027
KT211028
KT211029
KT211030
KT211031
KT211032
KT211033
KT211034
KT211035
KT211036
KT211037
KT211038
KT211039
KT211040
KT211041
KT211042
KT211043
KT211044
KT211045
KT211046
KT211047
KT211048
KT211049
KT211050
KT211051
KT218522
KT218523
KT218524
KT218525
KT247378
KT247379
KT247380
KT247381
KT247382
KT247383
KT247384
KT247385
KT308159
KT308160
KT308161
KT308162
KT308163
KT324224
KT324225
KT324226
KT324227
KT324228
KT327163
KT327164
KT327165
KT327166
KT327167
KT336777
KT336778
KT336779
KT336780
KT336781
KT336782
KT336783
KT336784
KT336785
KT336786
KT336787
KT336788
KT336789
KT336790
KT336791
KT336792
KT336793
KT336794
KT336795
KT336796
KT336797
KT336798
KT336799
KT444685
KT444686
KT444687
KT444688
KT444689
KT449801
KT581023
KU196259
KU196260
KU196261
KU196262
KU196263
KU196264
KU196265
KU196266
KU196267
KU196268
KU216360
KU216361
KU216362
KU216363
KU216364
KU216365
KU295117
KU295118
KU295119
KU295120
KU295121
KU295122
KU295123
KU295124
KU295125
KU295126
KU295127
KU295128
KU295129
KU295130
KU355832
KU355833
KU355834
KU355835
KU365366
KU365367
KU365368
KU365369
KU365370
KU365371
KU365372
KU365373
KU365374
KU518330
KU518331
KU518332
KU518333
KU518334
KU518335
KU518336
KU518337
KU518338
KU518339
KU518340
KU518341
KU518342
KU518343
KU561427
KU561428
KU561429
KU561430
KU561431
KU561432
KU561433
KU561434
KU561435
KU561436
KU561437
KU561438
KU561439
KU561440
KU561441
KU561442
KU561443
KU561444
KU561445
KU561446
KU561447
KU561448
KU561449
KU561450
KU561451
KU561452
KU561453
KU561454
KU561455
KU561456
KU561457
KU561458
KU561459
KU561460
KU561461
KU561462
KU561463
KU561464
KU561465
KU561466
KU724228
KU724229
KU724230
KU724231
KU724232
KU724233
KU724234
KU724235
KU724236
KU724237
KU724238
KU724239
KU724240
KU724241
KU724242
KU724243
KU724244
KU724245
KU724246
KU724247
KU724248
KU724249
KU724250
KU724251
KU724252
KU724253
KU724254
KU724255
KU724256
KU724257
KU724258
KU724259
KU724260
KU724261
KU724262
KU724263
KU724264
KU724265
KU724266
KU727168
KU727169
KU727170
KU727171
KU727172
KU727173
KU747171
KU747172
KU940225
KU940226
KU951112
KU951113
KU951114
KU951115
KU951116
KU951117
KU951118
KU951119
KU951120
KU951121
KU951122
KU951123
KU955432
KU955433
KU955434
KU955435
KU955436
KU955437
KU955438
KU955439
KU955440
KU955441
KU955442
KU955443
KU955444
KU955445
KU955446
KU955447
KU955448
KU955449
KU955450
KU955451
KU955452
KU955453
KU955454
KU955455
KU955456
KU955457
KU955458
[truncated: 531 more rows]

## Sheet: ZIKV
AY632535
DQ859059
EU545988
KF268948
KF268949
KF268950
KF383115
KF383116
KF383117
KF383118
KF383119
KJ776791
KR872956
KU179098
KU312312
KU321639
KU365777
KU365778
KU365779
KU365780
KU497555
KU501215
KU501216
KU501217
KU509998
KU527068
KU647676
KU681081
KU681082
KU707826
KU720415
KU729217
KU729218
KU740184
KU744693
KU758877
KU761560
KU761561
KU761564
KU820897
KU820898
KU820899
KU853012
KU853013
KU866423
KU870645
KU922923
KU922960
KU926309
KU926310
KU937936
KU940224
KU940228
KU955589
KU955590
KU955591
KU955592
KU955593
KU955594
KU955595
KU963573
KU963574
KU963796
KU991811
KU997667
KX013000
KX051560
KX051561
KX051562
KX051563
KX056898
KX087101
KX087102
KX117076
KX156774
KX156775
KX156776
KX185891
KX197192
KX197205
KX198134
KX198135
KX247632
KX247646
KX253996
KX262887
KX266255
KX269878
KX280026
KX369547
KX377335
KX377336
KX377337
KX421194
KX421195
KX446950
KX446951
KX447509
KX447510
KX447511
KX447512
KX447513
KX447514
KX447515
KX447516
KX447517
KX520666
KX548902
KX601166
KX601167
KX601168
KX601169
KX673530
KX694532
KX694533
KX694534
KX702400
KX766028
KX766029
KX806557
KX811222
KX813683
KX827268
KX827309
KX830930
KX830960
KX832731
KX838904
KX838905
KX838906
KX842449
KX856011
KX879603
KX879604
KX893855
KX922703
KX922704
KX922705
KX922706
KX922707
KX922708
KY003153
KY003154
KY014295
KY014296
KY014297
KY014299
KY014300
KY014302
KY014303
KY014304
KY014305
KY014306
KY014310
KY014312
KY014314
KY014315
KY014316
KY014317
KY014318
KY014319
KY014320
KY014321
KY014322
KY014323
KY014324
KY014325
KY014327
KY075932
KY075933
KY075934
KY075935
KY075936
KY075937
KY075938
KY075939
KY120348
KY120349
KY126351
KY241671
KY241673
KY241675
KY241676
KY241677
KY241678
KY241679
KY241680
KY241681
KY241682
KY241683
KY241685
KY241686
KY241687
KY241688
KY241689
KY241690
KY241691
KY241692
KY241693
KY241694
KY241695
KY241696
KY241697
KY241698
KY241699
KY241700
KY241701
KY241703
KY241704
KY241706
KY241707
KY241708
KY241711
KY241712
KY241713
KY241714
KY241716
KY241717
KY241719
KY241720
KY241721
KY241722
KY241725
KY241726
KY241727
KY241728
KY241729
KY241730
KY241733
KY241734
KY241736
KY241738
KY241740
KY241741
KY241744
KY241748
KY241749
KY241750
KY241751
KY241754
KY241756
KY241757
KY241758
KY241759
KY241767
KY241773
KY241776
KY241777
KY241778
KY241779
KY241780
KY241781
KY241782
KY241783
KY241785
KY241787
KY241788
KY272987
KY272991
KY288905
KY317936
KY317937
KY317938
KY317939
KY317940
KY325464
KY325465
KY325468
KY325469
KY325472
KY325473
KY325476
KY325479
KY328289
KY328290
KY348640
KY348860
KY415986
KY415988
KY415989
KY553111
KY558999
KY559005
KY559007
KY559013
KY559015
KY559027
KY606271
KY606272
KY606273
KY631492
KY631493
KY631494
KY648934
KY693676
KY693677
KY693678
KY693679
KY693680
KY765317
KY765318
KY765320
KY765321
KY765322
KY765323
KY765324
KY765325
KY765326
KY785415
KY785418
KY785420
KY785422
KY785435
KY785441
KY785442
KY785448
KY785450
KY785455
KY785464
KY785466
KY785468
KY785469
KY785475
KY785476
KY927808
KY967711
KY989511
KY989971
LC002520
LC190723
LC191864
LC219720
MF098766
MF098768
MF098771
MF159531
MF167360
MF352141
MF376166
MF384325
MF434516
MF434517
MF434521
MF434522
MF438286
MF574552
MF574553
MF574554
MF574555
MF574556
MF574557
MF574558
MF574559
MF574560
MF574561
MF574562
MF574563
MF574564
MF574565
MF574566
MF574567
MF574568
MF574569
MF574570
MF574571
MF574572
MF574573
MF574574
MF574575
MF574576
MF574578
MF574579
MF574580
MF574584
MF574585
MF574586
MF574587
MF593625
MF664436
MF692778
KY120352
KY120353
KY558996
KY766069
MF098764
MF098765
KX906952
MF099651
MF794971
MF801378
MF801381
MF801387
MF801395
MF801396
MF801397
MF801398
MF801402
MF801403
MF801406
MF801410
MF801412
MF801413
MF801414
MF801417
MF801418
MF801426
MF988743
LC331561
MG494697
MG595216
MG645981
MG674718
MG674719
